# Supplementary material for: A conserved haplotype controls parallel adaptation in geographically distant salmonid populations
Source: PubMed Central journal article supplement (PMC3664428; doi:10.1111/j.1365-294x.2011.05305.x), 2012-01

**WS01**

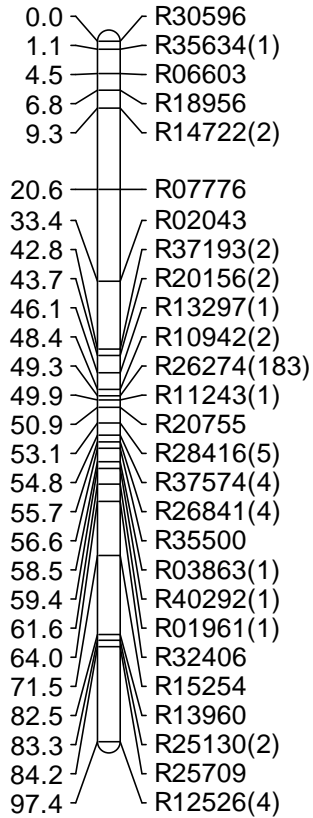

**WS02**

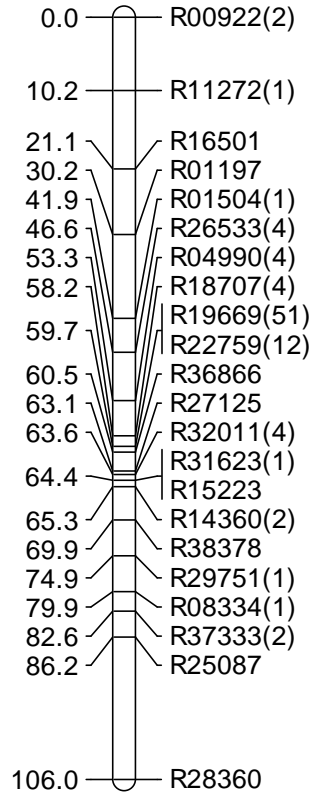

**WS03**

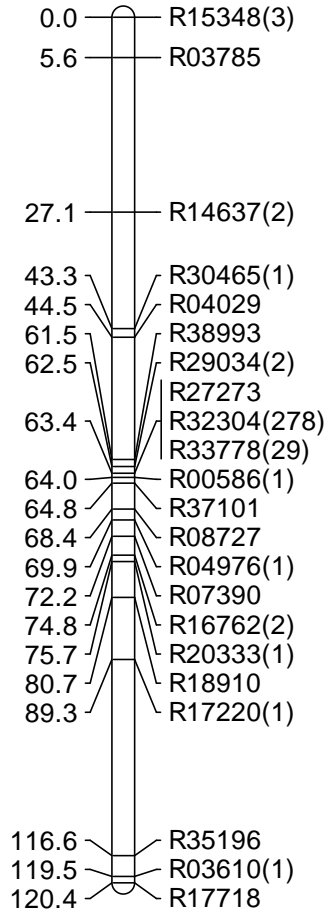

**WS04**

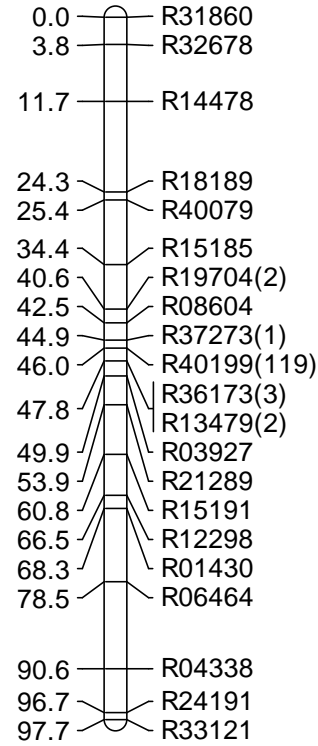

**WS05**

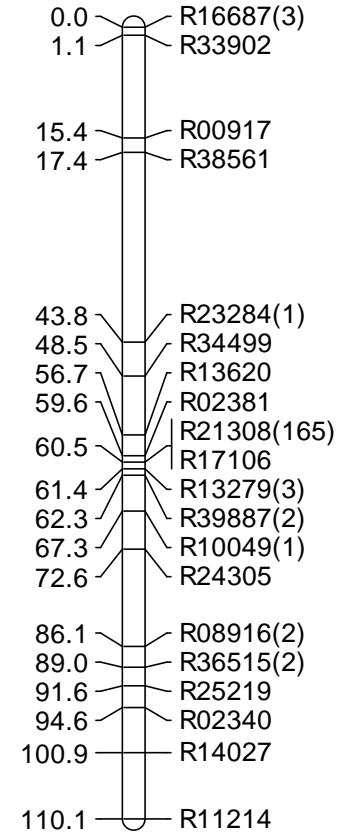

**WS06**

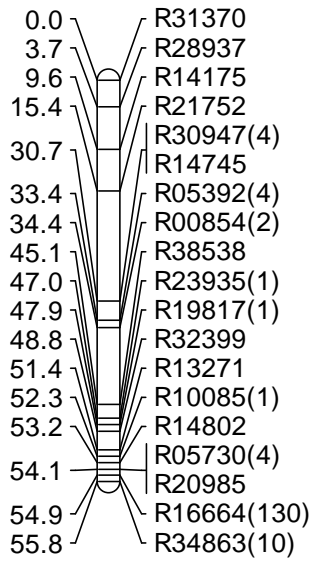

**WS07**

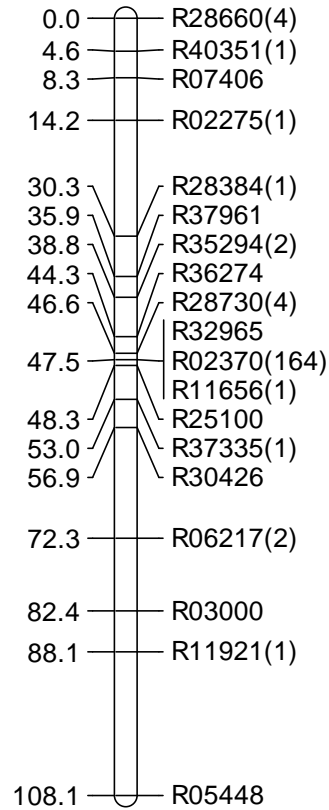

**WS08**

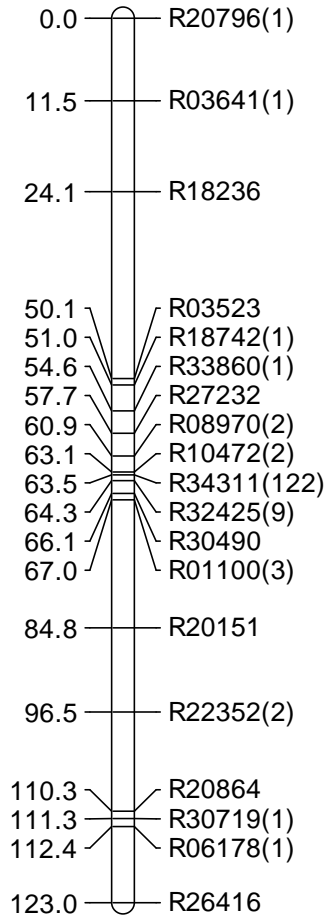

**WS09**

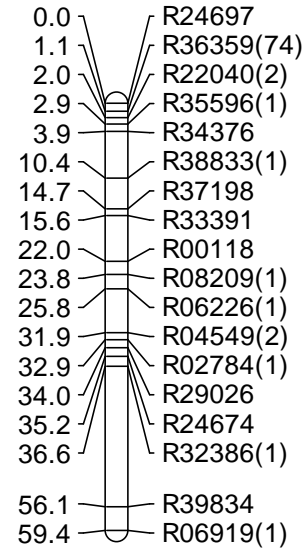

**WS10**

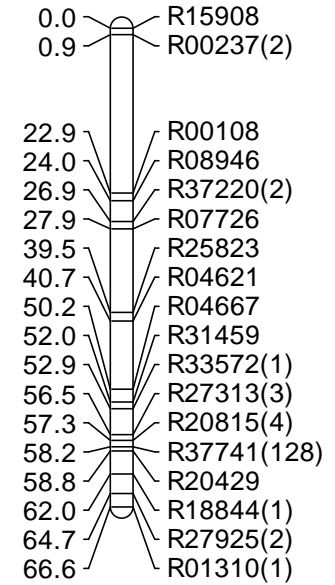

**WS11**

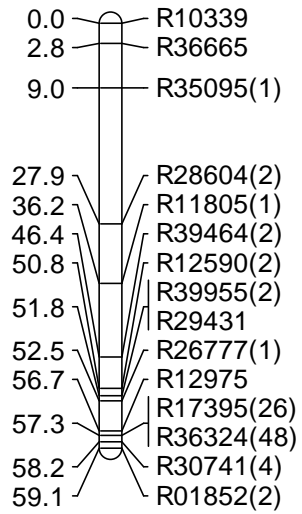

**WS12**

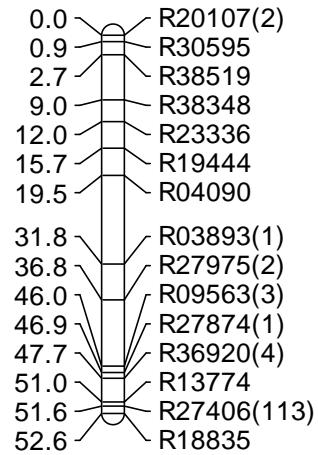

**WS13**

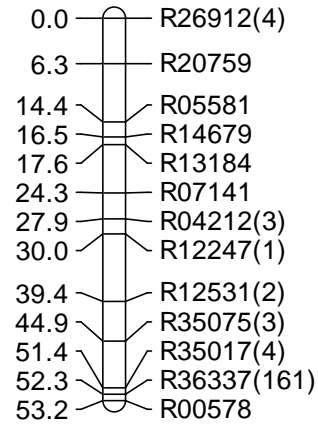

**WS14**

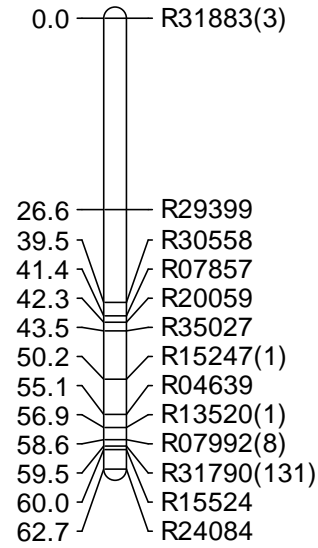

**WS15**

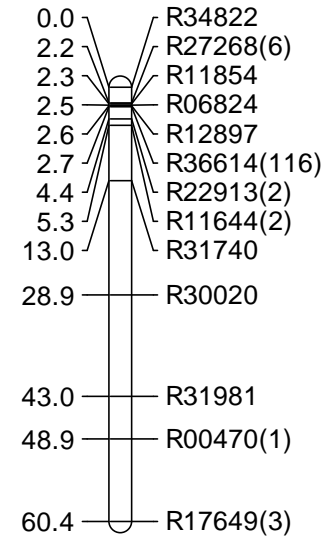

**WS16**

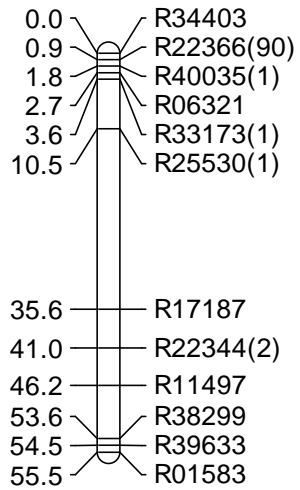

**WS17**

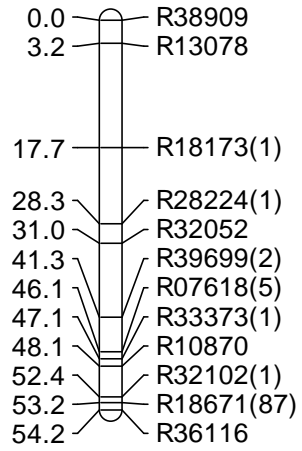

**WS18**

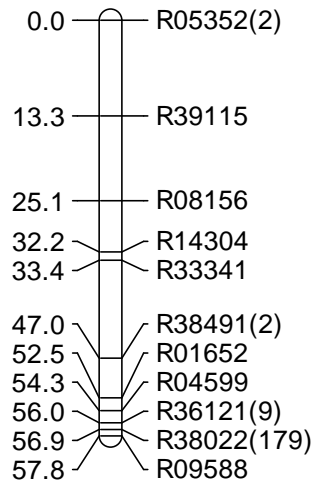

**WS19**

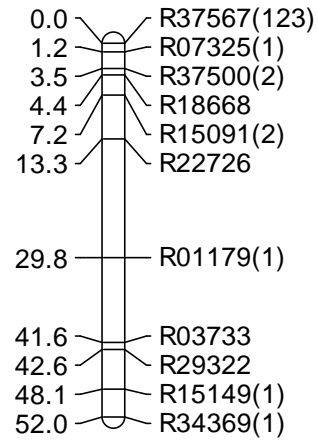

**WS20**

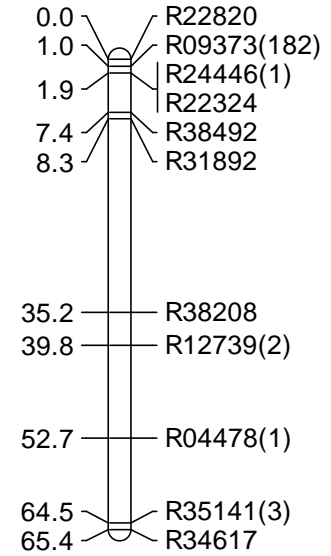

**WS21**

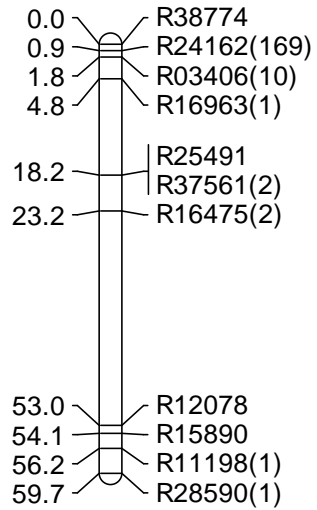

**WS22**

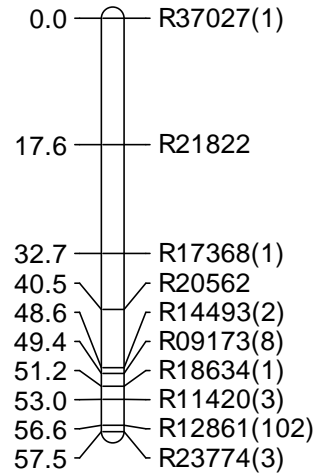

**WS23**

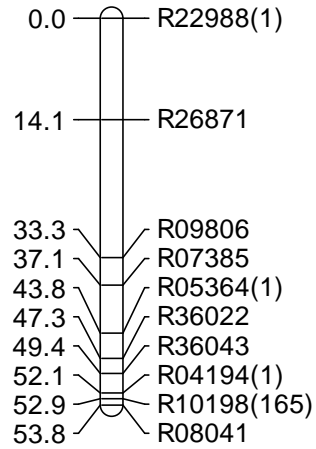

**WS24**

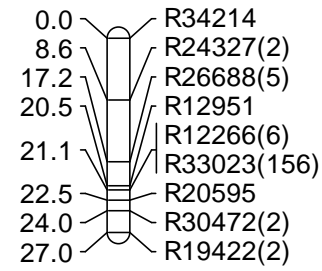

**WS25**

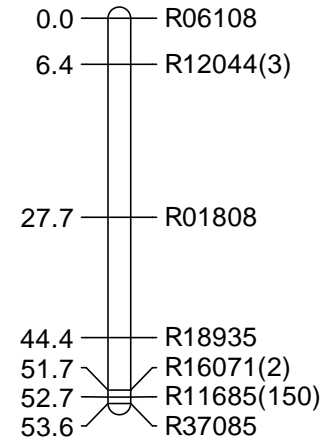

**WS26**

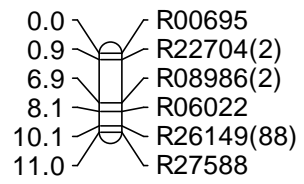

**WS27**

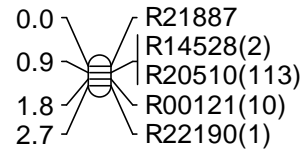

**WS28**

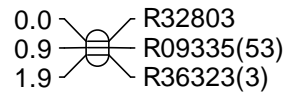

**WS29**

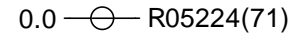

Supplement: mec0021-0237-SD1.pdf [file mec0021-0237-SD1.pdf]
